# Supplementary material for: Ultra-sensitive humidity sensors based on ZnSb2O4 nanoparticles
Source: Royal Society of Chemistry journal article supplement (doi:10.1039/c4ra13398f), 2014-12-01
Supplement: c4ra13398f1.pdf [file c4ra13398f1.pdf]

## Electronic Supplementary Information

### Ultra-Sensitive Humidity Sensors Based on ZnSb<sub>2</sub>O<sub>4</sub> Nanoparticles

Mianzeng Zhong<sup>1</sup>, Zhongming Wei<sup>2,\*</sup>, Xiuqing Meng<sup>1</sup>, Fengmin Wu<sup>1</sup> and Jingbo Li<sup>1,3,\*</sup>

<sup>1</sup> Zhejiang Provincial Key Laboratory of Solid State Optoelectronic Devices, Zhejiang Normal University, Jinhua 321004, China

<sup>2</sup> Nano-Science Center & Department of Chemistry, University of Copenhagen, Universitetsparken 5, DK-2100 Copenhagen Ø, Denmark

<sup>3</sup> State Key Laboratory of Superlattices and Microstructures, Institute of Semiconductors, Chinese Academy of Sciences, P.O. Box 912, Beijing 100083, China

Email: [jbli@semi.ac.cn](mailto:jbli@semi.ac.cn) and [zmwei@semi.ac.cn](mailto:zmwei@semi.ac.cn)

**Humidity Testing of ZnSb<sub>2</sub>O<sub>4</sub> NPs -based humidity sensor:**

The relative humidity is controlled by the concentration of sulfuric acid, the Specific humidity value and the corresponding concentration of sulfuric acid are shown in Tab. S1.[1-4] The I-V curves of ZnSb<sub>2</sub>O<sub>4</sub> nanoparticles in different RH atmosphere are recorded after humidity sensor is placed in the chamber with different RH in N<sub>2</sub> for 30 mins. The dynamic testing scheme of humidity sensing properties is shown in Fig.S2.[1]

**Calculation of the crystallite size of the particles by Scherrer Formula.**

The particle sizes of ZnSb<sub>2</sub>O<sub>4</sub> were estimated from XRD patterns according to Scherrer Formula:

$$D_{(hkl)} = K\lambda / \beta \cos \theta \quad (1)$$

Where  $D_{(hkl)}$  is the average particle size corresponding to the  $(hkl)$  crystalline plane,  $\beta$  is the full width of the peak at half of the maximum (FWHM) intensity (rad),  $\lambda$  the wavelength of X-ray radiation (1.54178Å ), K is a constant related to the crystallite shape, and  $\theta$  is the the Bragg angle (deg).[5, 6] The calculation results are shown in Tab.S2.

|                                            |     |    |    |    |    |    |     |
|--------------------------------------------|-----|----|----|----|----|----|-----|
| RH (%)                                     | 0   | 15 | 30 | 50 | 70 | 90 | 100 |
| The concentration of sulfuric acid (w.t.%) | 100 | 68 | 57 | 45 | 36 | 15 | 0   |

Tab. S1 The specific humidity value and the corresponding concentration of sulfuric acid.

|                           |       |       |       |       |       |       |       |       |       |       |
|---------------------------|-------|-------|-------|-------|-------|-------|-------|-------|-------|-------|
| Crystalline plane (h k l) | (200) | (211) | (220) | (310) | (202) | (330) | (411) | (420) | (213) | (332) |
| crystallite size(Å)       | 534   | 528   | 487   | 533   | 518   | 561   | 493   | 570   | 543   | 532   |

Table. S2 The crystallite size of  $\text{ZnSb}_2\text{O}_4$  calculated by the Scherrer Formula to different Crystalline planes.

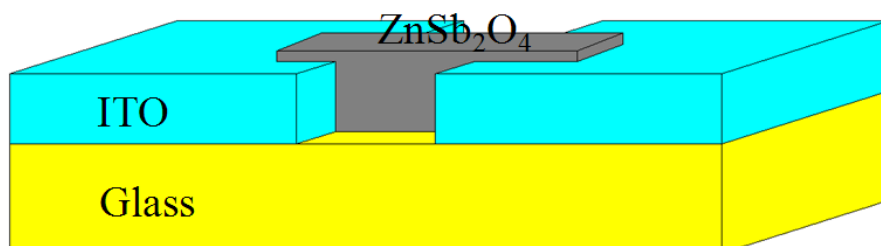

Fig. S1 Schematic of the  $\text{ZnSb}_2\text{O}_4$  NPs-based humidity sensor.

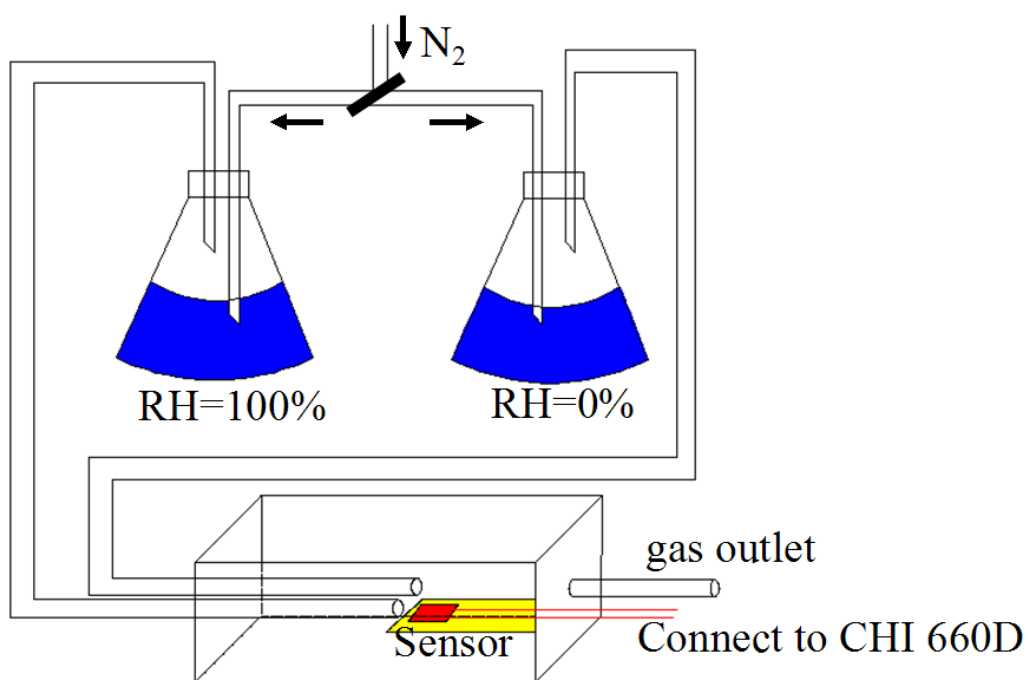

Fig. S2 Schematic for dynamic measurement of humidity sensing properties.

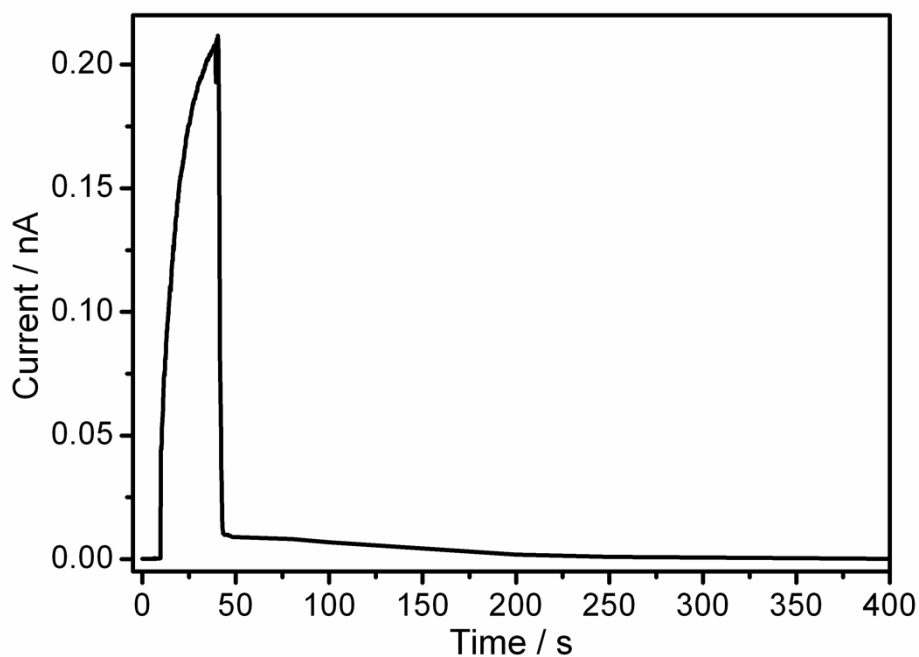

Fig. S3 A complete process of water molecules absorption-desorption. The response and recovery time under fast change of RH values between 0% RH in N<sub>2</sub> (“off” status) and 100% RH in N<sub>2</sub> (“on” status). The bias voltage between two electrodes was kept constantly at 2.0 V.

### References

- S1 J. Feng, L. Peng, C. Wu, X. Sun, S. Hu, C. Lin, J. Dai, J. Yang and Y. Xie, *Adv. Mater.*, 2012, **24**, 1969-1974.
- S2 S. Shankman and A.R. Gordon, *J. Am. Chem. Soc.*, 1939, **61**, 2370-2373.
- S3 W. F. Giauque, E. W. Hornung, J. E. Kunzler and T. R. Rubin, *J. Am. Chem. Soc.*, 1960, **82**, 62-70.
- S4 E. W. Hornung and W. F. Giauque, *J. Am. Chem. Soc.*, 1955, **77**, 2744-2746.
- S5 B. Xue, P. Chen, Q. Hong, J. Lin and K. L. Tan, *J. Mater. Chem.*, 2001, **11**, 2378-2381.
- S6 V. M. Rusu, C. H. Ng, M. Wilke, B. Tiersch, P. Fratzl and M. G. Peter, *Biomaterials*, 2005, **26**, 5414-5426.
